# Supplementary material
Source: Springer Nature journal article supplement (https://www.springermedizin.de/resource/supplementary/13054_2011_9554_MOESM6_ESM.pdf/9706462)
Supplement: MOESM6 [file 9706462]

**Table 4:** Use of hospital resources

| Variable                                     | Study (n=53) | Control (n=53) | P Value |
|----------------------------------------------|--------------|----------------|---------|
| Use of mechanical ventilation, n (%)         |              |                |         |
| Invasive                                     | 10 (18.9%)   | 18 (34%)       | .03984  |
| Non-invasive                                 | 5 (9.4%)     | 6 (11.3%)      | NS      |
| Number of days using mechanical ventilation* | 7 (4-12)     | 15 (9-21)      | .0033   |
| Number of ICU days*                          | 7 (4-12)     | 13 (9-18)      | <.0001  |
| Number of hospital days*                     | 9 (6-14)     | 19 (13-24)     | <.0001  |

\*Distribution considered as non-normal in accordance with the Shapiro-Wilks Test, values presented as medians (25% quartile-75% quartile) and p value calculated using the Wilcoxon Rank Sum Test;NS: The p values was considered non-significant ( $p > 0.05$ ); ICU: Intensive care unit
